## Editorial Board

### EDITOR-IN-CHIEF

**Erin L. Dolan**  
University of Georgia  
eldolan@uga.edu

### SENIOR EDITORS

**Daron Barnard**  
Worcester State University  
daron.barnard@worcester.edu

**Cynthia Bauerle**  
James Madison University  
bauerlc@jmu.edu

**Graham F. Hatfull**  
University of Pittsburgh  
gfh@pitt.edu

### EDITORS

**Joel K. Abraham**  
California State University, Fullerton  
jkabraham@fullerton.edu

**Bruce Alberts**  
University of California, San Francisco  
balberts@ucsf.edu

**Tessa C. Andrews**  
University of Georgia  
tandrews@uga.edu

**Molly Bolger**  
University of Arizona  
mbolger@email.arizona.edu

**Jana Bouwma-Gearhart**  
Oregon State University  
Jana.Bouwma-Gearhart@oregonstate.edu

**Cynthia Brame**  
Vanderbilt University  
cynthia.brame@vanderbilt.edu

**Derek Braun**  
Gallaudet University  
derek.braun@gallaudet.edu

**Clark Coffman**  
Iowa State University  
ccoffman@iastate.edu

**John Coley**  
Northeastern University  
j.coley@neu.edu

**Sarah L. Eddy**  
Florida International University  
seddy@fiu.edu

**David Feldon**  
Utah State University  
david.feldon@usu.edu

**Grant Ean Gardner**  
Middle Tennessee State University  
Grant.Gardner@mtsu.edu

**Stephanie Gardner**  
Purdue University  
sgardne@purdue.edu

**Julia Gouvea**  
Tufts  
Julia.Gouvea@tufts.edu

**James Hewlett**  
Finger Lakes Community College  
hewletja@flcc.edu

**Jennifer Knight**  
University of Colorado, Boulder  
jennifer.knight@colorado.edu

**Stanley M. Lo**  
University of California San Diego  
smlo@ucsd.edu

**Jennifer Loertscher**  
Seattle University  
loertscher@seattleu.edu

**Tammy Long**  
Michigan State University  
longta@msu.edu

**Gil Marbach-Ad**  
University of Maryland  
mack@aacu.org

**Jenny McFarland**  
Retired, Edmonds Community College  
jennyleemcfarland@gmail.com

**Emily Miller**  
Association of American Universities  
emily.miller@aau.edu

**Jennifer Momsen**  
North Dakota State University  
Jennifer.Momsen@ndsu.edu

**Ross Nehm**  
Stony Brook University  
ross.nehm@stonybrook.edu

**Erika Offerdahl**  
Washington State University  
erika.offerdahl@wsu.edu

**Rebecca Price**  
University of Washington Bothell  
beccap@uw.edu

**Brian Sato**  
UC Irvine  
bsato@uci.edu

**Jeff Schinske**  
De Anza College  
schinskejeff@fhda.edu

**Anita Schuchardt**  
University of Minnesota Twin Cities  
aschucha@umn.edu

**Elisabeth Schussler**  
University of Tennessee Knoxville  
eschuss@utk.edu

**Rachelle Spell**  
Emory University  
rspell@emory.edu

**Marilyne Stains**  
University of Nebraska, Lincoln  
mstains2@unl.edu

**Kimberly Tanner**  
San Francisco State University  
kdtanner@sfsu.edu

**Carl Wieman**  
Stanford University  
cwieman@stanford.edu

**Kristy Jean Wilson**  
Marian University  
kjiwilson@marian.edu

**Adele Wolfson**  
Wellesley College  
awolfson@wellesley.edu

### PUBLISHER

**Erika C. Shugart**  
ASCB Chief Executive Officer

**W. Mark Leader**  
ASCB Publications Director

**Thea Clarke**  
ASCB Director of Communications  
and Education

**Eric T. Baker**  
ASCB Journals Manager

Published by

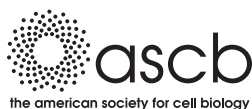

Editorial Partner

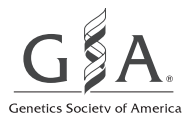

CBE—Life Sciences Education (ISSN 1931-7913) is published online quarterly (one volume per year) by The American Society for Cell Biology, 6120 Executive Boulevard, Suite 750, Rockville, MD 20852, USA; www.ascb.org. The journal, which is accessible at www.lifescied.org and www.pubmedcentral.nih.gov, is supported in part by a grant from the Howard Hughes Medical Institute. "ASCB," "The American Society for Cell Biology," "iBioSeminars," and "Molecular Biology of the Cell" are registered trademarks of The American Society for Cell Biology. "The Cell: An Image Library" is a common law trademark of The American Society for Cell Biology.

Owned and published by The American Society for Cell Biology, Erika C. Shugart, *Chief Executive Officer*
